# Supplementary material
Source: PubMed Central journal article supplement (PMC6829283)
Supplement: NIHMS1056515-supplement-Supplemental_Figure_2.pdf [file NIHMS1056515-supplement-Supplemental_Figure_2.pdf]

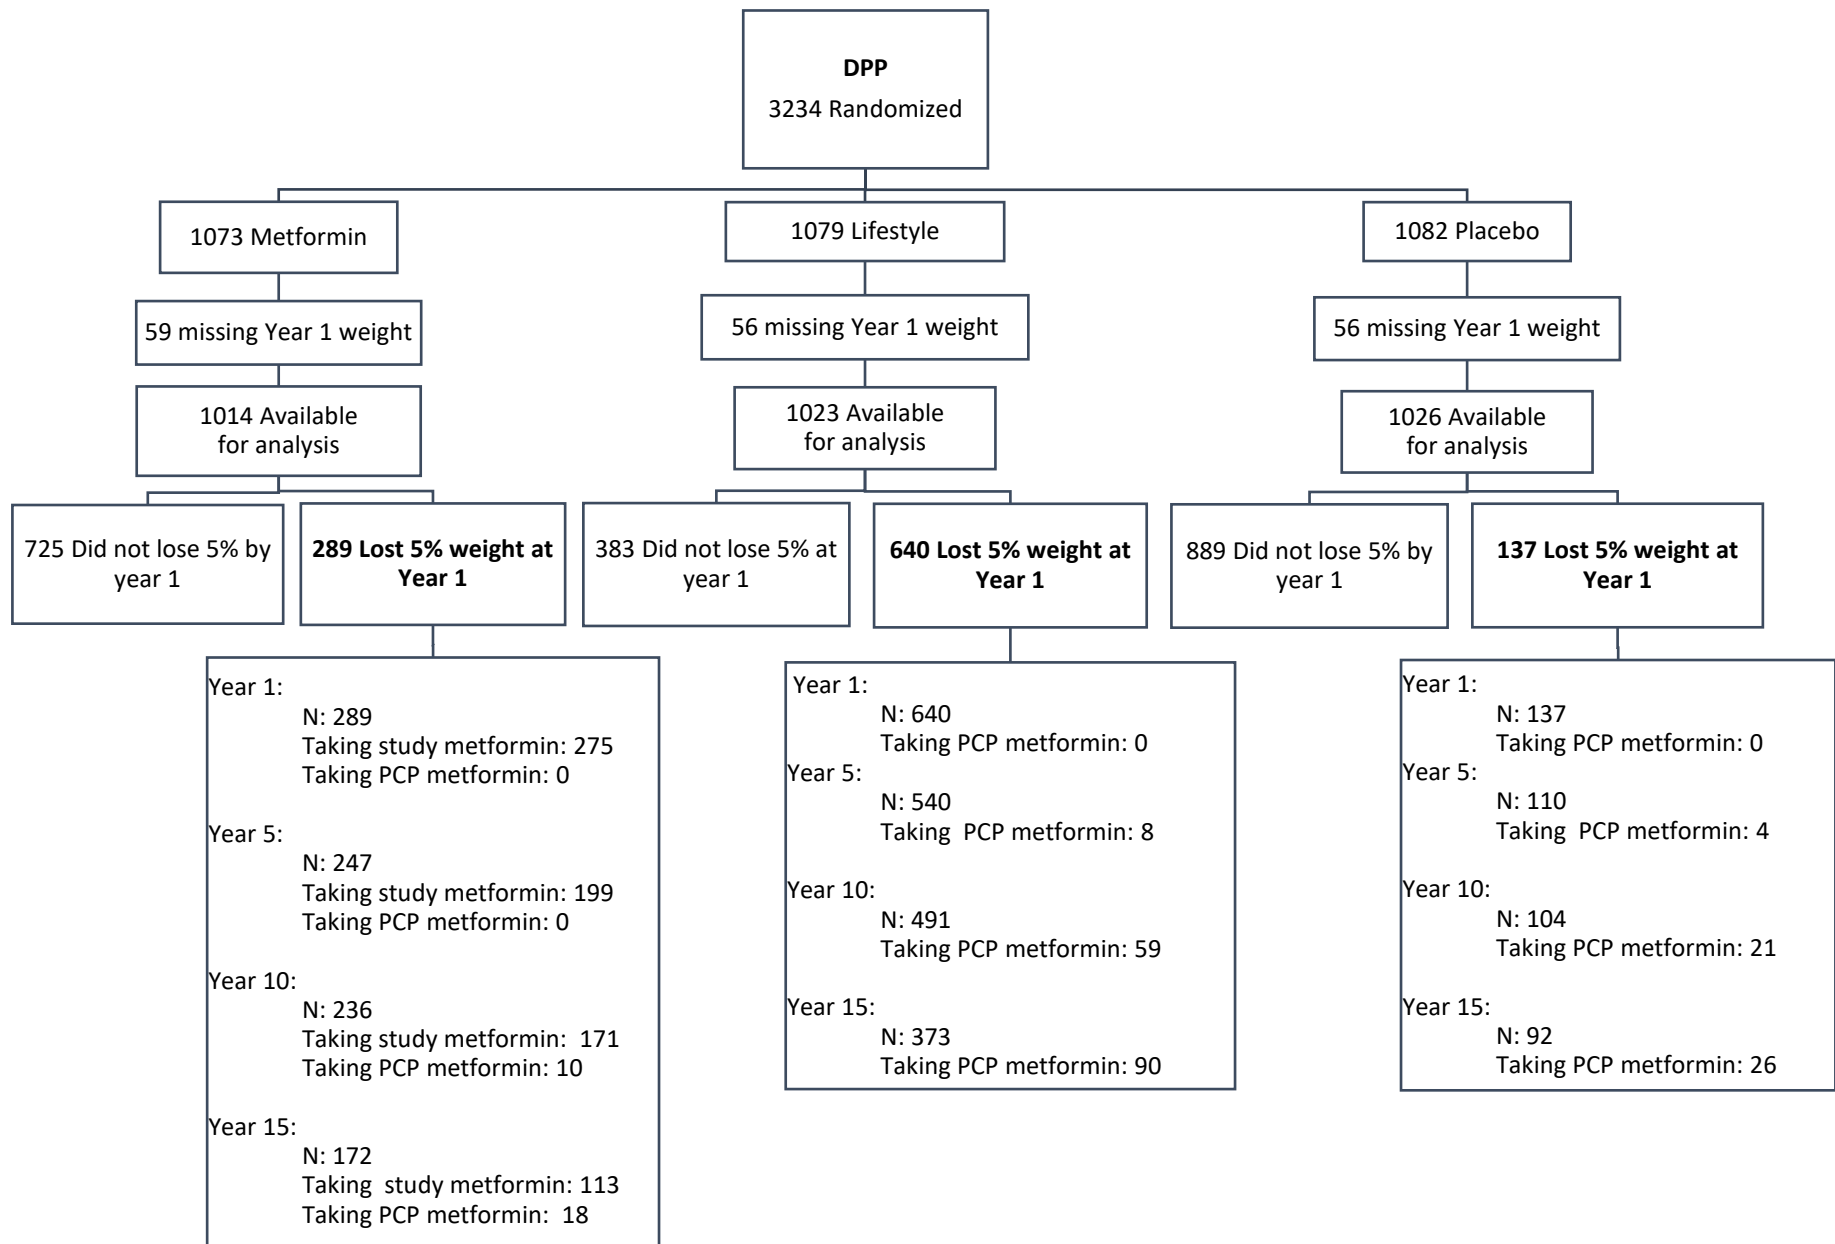

**Appendix Figure 2. CONSORT Diagram; Flow of participants through the trial.** Shown are the number of participants randomized to DPP overall and by achieving 5% weight loss at year 1. Among those who achieved 5% weight loss at Year 1, shown are the number of participants remaining in DPP/DPPOS at years 5, 10 and 15 along with the numbers taking study provided (original metformin group only) or Primary Care Provider (PCP) metformin. Participants discontinued DPP and DPPOS visits for a variety of reasons including loss to followup, health and mobility issues, and death.
