# Supplementary material
Source: PubMed Central journal article supplement (PMC6829283)
Supplement: NIHMS1056515-supplement-Supplemental_Table_1.pdf [file NIHMS1056515-supplement-Supplemental_Table_1.pdf]

**Appendix Table 1. Baseline Characteristics of Participants in the Metformin, ILS, and Placebo groups who lost  $\geq$  5% body weight at year 1 compared to those that did not lose 5% body weight at year 1.**

|                                | Metformin    |                   |              | ILS          |                   |                  | Placebo      |                   |         |
|--------------------------------|--------------|-------------------|--------------|--------------|-------------------|------------------|--------------|-------------------|---------|
|                                | <5% wt loss  | $\geq$ 5% wt loss | p-value      | <5% wt loss  | $\geq$ 5% wt loss | p-value          | <5% wt loss  | $\geq$ 5% wt loss | p-value |
| N                              | 725          | 289               |              | 383          | 640               |                  | 889          | 137               |         |
| <b>Demographics</b>            |              |                   |              |              |                   |                  |              |                   |         |
| Age at randomization (y)       | 50.8 (10.1)  | 52.1 (10.7)       | 0.071        | 48.2 (10.8)  | 52.3 (11.3)       | <b>&lt;0.001</b> | 50.5 (10.4)  | 50.3 (9.8)        | 0.84    |
| Sex                            |              |                   | 0.142        |              |                   | <b>0.001</b>     |              |                   | 0.40    |
| Men (n, %)                     | 261 (36%)    | 90 (31%)          |              | 98 (25.6%)   | 228 (35.6%)       |                  | 282 (31.7%)  | 38 (27.7%)        |         |
| Women (n, %)                   | 464 (64%)    | 199 (69%)         |              | 285 (74.4%)  | 412 (64.4%)       |                  | 607 (68.3%)  | 99 (72.3%)        |         |
| Race/Ethnicity                 |              |                   | 0.27         |              |                   | <b>&lt;0.001</b> |              |                   | 0.22    |
| White (n, %)                   | 395 (54.5%)  | 168 (58.1%)       |              | 179 (46.7%)  | 380 (59.4%)       |                  | 477 (53.7%)  | 85 (62%)          |         |
| Black (n, %)                   | 157 (21.7%)  | 54 (18.7%)        |              | 97 (25.3%)   | 90 (14.1%)        |                  | 183 (20.6%)  | 22 (16.1%)        |         |
| Hispanic (n, %)                | 116 (16%)    | 40 (13.8%)        |              | 58 (15.1%)   | 107 (16.7%)       |                  | 134 (15.1%)  | 22 (16.1%)        |         |
| American Indian (n, %)         | 32 (4.4%)    | 20 (6.9%)         |              | 29 (7.6%)    | 28 (4.4%)         |                  | 54 (6.1%)    | 4 (2.9%)          |         |
| Asian (n, %)                   | 25 (3.4%)    | 7 (2.4%)          |              | 20 (5.2%)    | 35 (5.5%)         |                  | 41 (4.6%)    | 4 (2.9%)          |         |
| Education                      |              |                   | 0.58         |              |                   | 0.75             |              |                   | 0.42    |
| $\leq$ High School (n, %)      | 183 (25.2%)  | 72 (24.9%)        |              | 105 (27.4%)  | 162 (25.3%)       |                  | 237 (26.7%)  | 37 (27%)          |         |
| College (n, %)                 | 354 (48.8%)  | 133 (46.0%)       |              | 178 (46.5%)  | 309 (48.3%)       |                  | 419 (47.1%)  | 71 (51.8%)        |         |
| Post-College (n, %)            | 188 (25.9%)  | 84 (29.1%)        |              | 100 (26.1%)  | 169 (26.4%)       |                  | 233 (26.2%)  | 29 (21.2%)        |         |
| <b>Anthropometrics</b>         |              |                   |              |              |                   |                  |              |                   |         |
| Weight (kg)                    | 95 (20.3)    | 92.2 (18.4)       | <b>0.045</b> | 95 (20.8)    | 93.2 (20.3)       | 0.174            | 94.2 (20.2)  | 94.9 (20.2)       | 0.73    |
| BMI (kg/m <sup>2</sup> )       | 34.1 (6.7)   | 33.1 (6.0)        | <b>0.028</b> | 34.5 (6.9)   | 33.4 (6.5)        | <b>0.013</b>     | 34.1 (6.8)   | 34.5 (6.0)        | 0.54    |
| Waist (cm)                     | 105.7 (14.9) | 102.6 (12.7)      | <b>0.002</b> | 106.0 (15.1) | 104.4 (14.4)      | 0.097            | 105.2 (14.2) | 105.2 (14.1)      | 0.99    |
| Hip (cm)                       | 113.7 (13.5) | 112.1 (12.1)      | 0.078        | 115.6 (14.4) | 112.8 (13.5)      | <b>0.002</b>     | 114.3 (14.8) | 115.4 (12.2)      | 0.43    |
| Waist-hip ratio                | 0.93 (0.09)  | 0.92 (0.08)       | <b>0.017</b> | 0.92 (0.08)  | 0.93 (0.09)       | 0.112            | 0.92 (0.08)  | 0.91 (0.08)       | 0.134   |
| <b>Baseline Health History</b> |              |                   |              |              |                   |                  |              |                   |         |
| Family hx of diabetes (n, %)*  | 497 (68.6%)  | 204 (70.3%)       | 0.68         | 283 (73.9%)  | 426 (66.7%)       | <b>0.019</b>     | 621 (69.9%)  | 95 (69.3%)        | 0.97    |
| Alcohol use*                   |              |                   | <b>0.048</b> |              |                   | 0.130            |              |                   | 0.600   |
| None (n, %)                    | 384 (53.6%)  | 163 (57.8%)       |              | 227 (60.7%)  | 333 (53.2%)       |                  | 494 (56.5%)  | 75 (55.6%)        |         |
| <1/wk (n, %)                   | 137 (19.1%)  | 57 (20.2%)        |              | 66 (17.6%)   | 131 (20.9%)       |                  | 161 (18.4%)  | 21 (15.6%)        |         |
| >1/wk to 1/day (n, %)          | 162 (22.6%)  | 43 (15.2%)        |              | 66 (17.6%)   | 127 (20.3%)       |                  | 180 (20.6%)  | 34 (25.2%)        |         |
| $\geq$ 1/day (n, %)            | 33 (4.6%)    | 19 (6.7%)         |              | 51 (4.8%)    | 35 (5.6%)         |                  | 39 (4.5%)    | 5 (3.7%)          |         |

|                                   | Metformin            |                     |              | ILS                 |                     |              | Placebo             |                     |              |
|-----------------------------------|----------------------|---------------------|--------------|---------------------|---------------------|--------------|---------------------|---------------------|--------------|
|                                   | <5% wt loss          | ≥5% wt loss         | p-value      | <5% wt loss         | ≥5% wt loss         | p-value      | <5% wt loss         | ≥5% wt loss         | p-value      |
| Smoking                           |                      |                     | 0.34         |                     |                     | <b>0.021</b> |                     |                     | <b>0.002</b> |
| Never (n, %)                      | 417 (57.5%)          | 180 (62.3%)         |              | 242 (63.2%)         | 357 (55.8%)         |              | 527 (59.3%)         | 73 (53.3%)          |              |
| Current (n, %)                    | 51 (7.0%)            | 16 (5.5%)           |              | 26 (6.8%)           | 36 (5.6%)           |              | 59 (6.6%)           | 21 (15.3%)          |              |
| Past (n, %)                       | 257 (35.4%)          | 93 (32.2%)          |              | 115 (30.0%)         | 247 (38.6%)         |              | 303 (34.1%)         | 43 (31.4%)          |              |
| Gestational diabetes (n, %)**     | 63 (13.6%)           | 37 (18.7%)          | 0.093        | 59 (20.7%)          | 52 (12.6%)          | <b>0.006</b> | 99 (16.3%)          | 12 (12.1%)          | 0.36         |
| Antidepressant use (n, %)         | 43 (5.9%)            | 18 (6.2%)           | 0.86         | 26 (6.8%)           | 25 (3.9%)           | 0.057        | 36 (4.0%)           | 9 (6.6%)            | 0.26         |
| Beck depression                   | 4.6 (4.6)            | 4.2 (3.9)           | 0.22         | 4.8 (4.7)           | 4.4 (4.3)           | 0.136        | 4.6 (4.7)           | 4.8 (4.6)           | 0.59         |
| Beck anxiety                      | 3.9 (4.6)            | 3.81 (4.7)          | 0.73         | 4.7 (5.9)           | 3.8 (4.5)           | <b>0.005</b> | 4.0 (5.2)           | 3.8 (4.3)           | 0.63         |
| SF-6D                             | 0.80 (0.10)          | 0.80 (0.10)         | 0.56         | 0.79 (0.11)         | 0.81 (0.10)         | <b>0.015</b> | 0.80 (0.10)         | 0.80 (0.10)         | 0.97         |
| <b>Glucose and Insulin</b>        |                      |                     |              |                     |                     |              |                     |                     |              |
| Fasting glucose (mg/dl)           | 106.6 (8.5)          | 106.2 (8.3)         | 0.54         | 106.0 (8.4)         | 106.4 (7.9)         | 0.44         | 106.6 (8.4)         | 106.7 (8.2)         | 0.90         |
| 2-h glucose (mg/dl)               | 164.6 (17.0)         | 166.5 (17.7)        | 0.11         | 164.8 (17.2)        | 163.9 (16.6)        | 0.40         | 164.5 (17.2)        | 164.4 (16.9)        | 0.95         |
| HbA1c (%)                         | 5.9 (0.5)            | 5.9 (0.4)           | 0.30         | 5.9 (0.5)           | 5.9 (0.5)           | 0.39         | 5.9 (0.5)           | 5.9 (0.5)           | 0.84         |
| Fasting insulin (uU/ml)           | 27.6 (15.4)          | 25.8 (13.9)         | 0.07         | 27.7 (15.9)         | 25.8 (15.4)         | 0.062        | 26.7 (15.4)         | 26.1 (13.9)         | 0.66         |
| HOMA IR                           | 7.3 (4.3)            | 6.8 (3.87)          | 0.07         | 7.3 (4.4)           | 6.8 (4.3)           | 0.090        | 7.09 (4.29)         | 6.91 (3.73)         | 0.65         |
| <b>Blood Pressure</b>             |                      |                     |              |                     |                     |              |                     |                     |              |
| SBP (mmHg)                        | 123.5 (15.0)         | 125.5 (14.6)        | 0.06         | 122.7 (15.0)        | 124.0 (14.6)        | 0.185        | 123.6 (14.5)        | 122.6 (14.4)        | 0.45         |
| DBP (mmHg)                        | 78.3 (9.6)           | 77.7 (9.3)          | 0.36         | 78.4 (9.5)          | 78.6 (9.0)          | 0.74         | 78.2 (9.0)          | 76.9 (10.2)         | 0.134        |
| <b>Lipids</b>                     |                      |                     |              |                     |                     |              |                     |                     |              |
| Cholesterol (mg/dl)               | 203.1 (35.7)         | 201.4 (34.3)        | 0.50         | 203.3 (36.0)        | 204.6 (37.2)        | 0.59         | 203.1 (37.6)        | 200.3 (32.5)        | 0.41         |
| LDL (mg/dl)                       | 124.8 (32.3)         | 123.4 (31.6)        | 0.53         | 124.7 (32.0)        | 125.5 (32.9)        | 0.71         | 124.6 (34.3)        | 119.9 (29.3)        | 0.130        |
| HDL (mg/dl)                       | 46.2 (11.7)          | 45.9 (11.1)         | 0.68         | 46.5 (13.1)         | 45.9 (11.9)         | 0.46         | 44.9 (11.5)         | 44.2 (11.5)         | 0.49         |
| Triglycerides (mg/dl)             | 139.00 (50.6, 381.9) | 139.6 (51.7, 377.2) | 0.89         | 138.7 (50.2, 382.9) | 142.5 (50.5, 402.0) | 0.42         | 147.0 (55.3, 391.1) | 156.4 (55.1, 443.8) | 0.182        |
| <b>Adipocytokines/ Chemokines</b> |                      |                     |              |                     |                     |              |                     |                     |              |
| Adiponectin (ug/mL)               | 7.9 (3.5)            | 8.5 (3.4)           | <b>0.018</b> | 7.7 (3.6)           | 8.2 (3.5)           | 0.056        | 7.7 (3.2)           | 8.2 (4.0)           | 0.112        |

|                              | Metformin         |                   |              | ILS               |                   |                  | Placebo           |                    |              |
|------------------------------|-------------------|-------------------|--------------|-------------------|-------------------|------------------|-------------------|--------------------|--------------|
|                              | <5% wt loss       | ≥5% wt loss       | p-value      | <5% wt loss       | ≥5% wt loss       | p-value          | <5% wt loss       | ≥5% wt loss        | p-value      |
| Fibrinogen (mg/dL)           | 378.8 (86.6)      | 380.0 (81.3)      | 0.83         | 385.7 (87.4)      | 385.7 (85.0)      | 0.99             | 385.4 (86.4)      | 394.8 (81.7)       | 0.234        |
| IL6 (pg/mL)                  | 2.5 (2.4)         | 2.2 (1.7)         | <b>0.029</b> | 2.6 (2.1)         | 2.4 (2.2)         | 0.100            | 2.5 (2.1)         | 2.4 (1.5)          | 0.66         |
| tPA (ng/mL)                  | 11.3 (4.4)        | 11.0 (4.1)        | 0.38         | 11.6 (4.3)        | 11.2 (4.3)        | 0.25             | 11.5 (4.1)        | 10.9 (3.4)         | 0.132        |
| CRP (mg/dL)                  | 0.35 (0.04, 3.07) | 0.29 (0.04, 2.31) | <b>0.009</b> | 0.41 (0.05, 3.01) | 0.32 (0.04, 2.55) | <b>&lt;0.001</b> | 0.35 (0.04, 2.97) | 0.43 (0.06, 3.33)  | <b>0.034</b> |
| Leptin (ng/mL)               | 24.2 (15.4)       | 22.5 (13.4)       | 0.105        | 26.7 (15)         | 21.8 (13.7)       | <b>&lt;0.001</b> | 24.5 (14.1)       | 24.9 (13.4)        | 0.72         |
| eSelectin (ng/mL)            | 46.4 (17.8)       | 44.8 (16.2)       | 0.180        | 45.8 (17.3)       | 44.7 (17.6)       | 0.36             | 47.3 (19.6)       | 45.2 (18.3)        | 0.25         |
| MCP-1 (pg/mL)                | 152.8 (112.7)     | 154.0 (102.8)     | 0.88         | 148.6 (71.6)      | 145.2 (50.8)      | 0.37             | 148.5 (61.4)      | 159.6 (172.0)      | 0.161        |
| sICAM (ng/mL)                | 248.5 (75.8)      | 253.5 (82.5)      | 0.36         | 253.3 (87.5)      | 246.4 (71.1)      | 0.167            | 247.6 (76.1)      | 256.5 (77.9)       | 0.21         |
| <b>Sex Hormones</b>          |                   |                   |              |                   |                   |                  |                   |                    |              |
| FSH (women; mIU/L)           | 31.5 (25.8)       | 35.9 (27.5)       | 0.090        | 28.4 (25.8)       | 32.9 (28.5)       | 0.068            | 32.3 (28.8)       | 36.5 (27.6)        | 0.25         |
| DHEA (ng/mL)                 | 2397 (1625)       | 2397 (1454)       | 0.99         | 2543 (1558)       | 2552 (1854)       | 0.94             | 2480 (1665)       | 2637 (2048)        | 0.38         |
| DHEA-S (ng/mL)               | 911 (615)         | 911 (695)         | 0.99         | 996 (683)         | 919 (656)         | 0.094            | 909 (599)         | 998 (733)          | 0.136        |
| Androstenedione (men, pg/mL) | 778 (240)         | 815 (295)         | 0.27         | 789 (283)         | 773 (267)         | 0.65             | 785 (265)         | 851.8 (389)        | 0.20         |
| Testosterone (pg/mL)         | 553 (30, 10286)   | 473 (27, 8123)    | 0.172        | 424 (29, 6119)    | 556 (28, 11188)   | <b>0.010</b>     | 460 (27, 7893)    | 359 (26, 4920)     | 0.082        |
| SHBG (nmol/L)                | 55.7 (45.4)       | 58.3 (44.0)       | 0.44         | 54.7 (41.2)       | 55.2 (39.8)       | 0.87             | 55.1 (43.4)       | 51.3 (36.2)        | 0.35         |
| Estrone (E1) (pg/mL)         | 54.7 (51.4, 58.1) | 51.0 (45.6, 56.9) | 0.28         | 63.3 (18.8, 213)  | 51.29 (14.3, 183) | <b>&lt;0.001</b> | 54.1 (15.6, 187)  | 64.5 (18.3, 226.8) | 0.132        |
| Estradiol (E2) (pg/mL)       | 25.9 (24.0, 28.0) | 24.5 (21.7, 27.7) | 0.45         | 28.7 (4.03, 204)  | 22.9 (3.5, 149.8) | <b>&lt;0.001</b> | 24.6 (3.55, 170)  | 29.3 (3.6, 238)    | 0.081        |

Data are mean (SD) or geometric mean (95% confidence intervals) for non-normally distributed data; p-values for non-normally distributed data based on log-transformed values. ILS, Intensive Lifestyle intervention; SF-6D, Short-Form Six Dimension Questionnaire; SBP, Systolic Blood Pressure; DBP, Diastolic Blood Pressure; tPA, tissue Plasminogen Activator; CRP, C-Reactive Protein; IL6, Interleukin-6; MCP-1, Monocyte Chemoattractant Protein; sICAM, Soluble Intercellular Adhesion Molecule; FSH, Follicle Stimulating Hormone; DHEA, Dehydroepiandrosterone; DHEA-S, Dehydroepiandrosterone Sulfate; SHBG, Sex

Hormone Binding Globulin. \*Some participants were unable or refused to answer some questions at baseline; percents are among responders only.  
\*\*Among parous women only.
