# Supplementary material
Source: PubMed Central journal article supplement (PMC6829283)

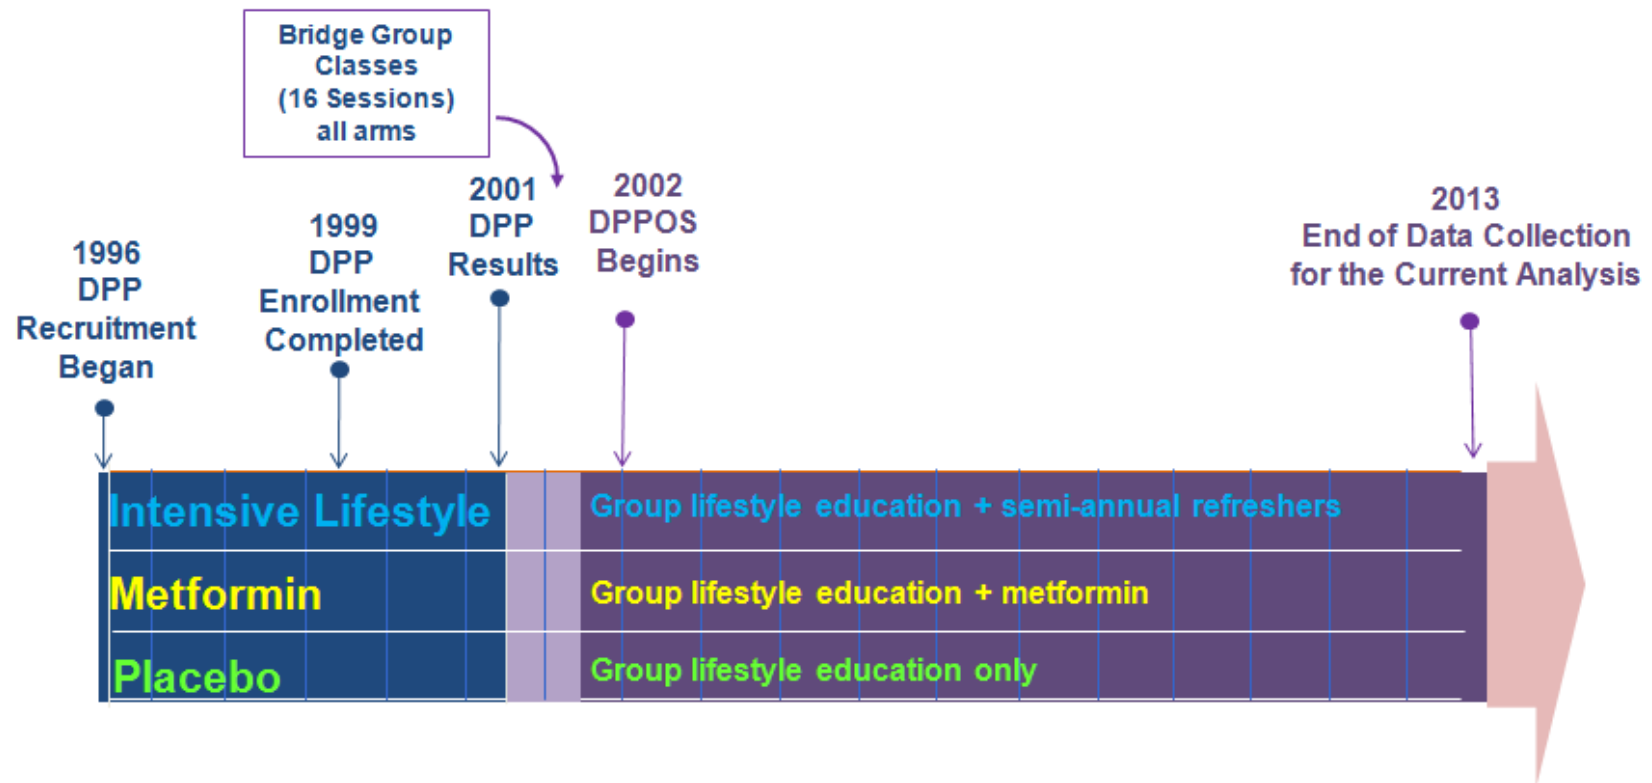

Appendix Figure 1: DPP and DPPOS Study Design

Supplement: NIHMS1056515-supplement-Supplemental_Figure_1.pdf [file NIHMS1056515-supplement-Supplemental_Figure_1.pdf]
